# Supplementary material
Source: PubMed Central journal article supplement (PMC8114546)
Supplement: advancesADV2021004232-suppl1.pdf [file advancesADV2021004232-suppl1.pdf]

|                                                      |                  |
|------------------------------------------------------|------------------|
| <b>Number<sup>^</sup></b>                            | <b>23</b>        |
| <b>Gender (Male, %)</b>                              | 14 (61%)         |
| <b>Age in years (mean, range)</b>                    | 29 (20-50)       |
| <b>Genotype (n)</b>                                  |                  |
| HbSS                                                 | 20               |
| HbSC                                                 | 1                |
| HbSβ+                                                | 2                |
| <b>Total Hb (gm/dL, range)</b>                       | 9·4 (7·3-13·6)   |
| <b>% HbS pre-exchange transfusion (mean, range)</b>  | 55·9 (18·1-87·1) |
| <b>% HbS post-exchange transfusion (mean, range)</b> | 26·4 (15·1-37·7) |
| <b>% HbF (mean, range)</b>                           | 8·3 (1-27·8)     |
| <b>% on HU prior to Plerixafor*</b>                  | 87               |
| <b>% on chronic transfusion therapy</b>              | 26               |
| <b>Baseline SCD-Related Complications (%)</b>        |                  |
| VOC                                                  | 78%              |
| Iron Overload                                        | 65%              |
| ACS                                                  | 57%              |
| Stroke                                               | 39%              |
| AVN                                                  | 35%              |
| PE/DVT                                               | 26%              |
| Depression/Anxiety                                   | 22%              |
| Cholecystectomy                                      | 18%              |
| Pulmonary Hypertension                               | 13%              |
| Priapism                                             | 13%              |
| OSA                                                  | 13%              |
| Line Infections                                      | 13%              |
| Silent Cerebral Infarct                              | 9%               |
| Leg Ulcers                                           | 9%               |
| Retinopathy                                          | 9%               |
| TRV >2·5                                             | 9%               |
| Moya Moya                                            | 9%               |
| DHTR                                                 | 4%               |

### Supplemental Table 1. Participant Demographics

ACS: acute chest syndrome, AVN: avascular necrosis, DHTR: delayed hemolytic transfusion reaction, Hb: hemoglobin, HU: hydroxyurea, PE/DVT: pulmonary embolism/deep vein thrombosis, OSA: obstructive sleep apnea, SCD: sickle cell disease, TRV: tricuspid regurgitant velocity, VOC: vaso-occlusive crisis. <sup>^</sup> NIH N=20, SJH cohort N=3. \*Hydroxyurea was discontinued at least 2 weeks prior to Plerixafor administration in all subjects

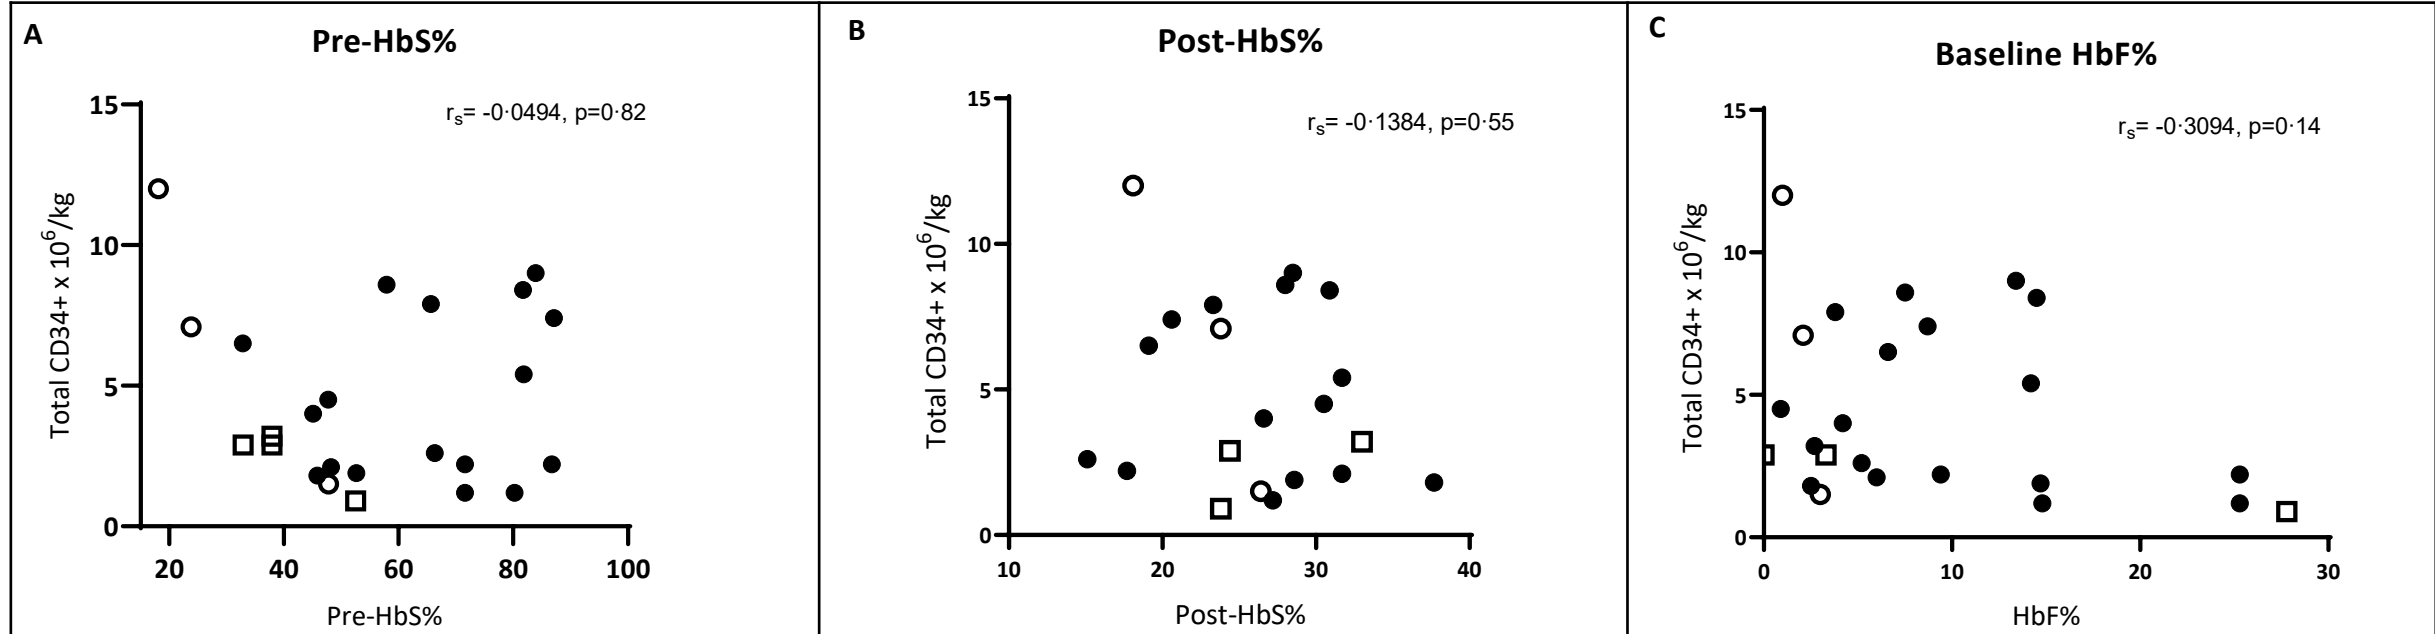

**Supplemental Figure 1. Correlation of total CD34+ collection with hemoglobin content**

A-D. Association of hemoglobin content (pre- and post-exchange transfusion HbS% and baseline HbF%) and total CD34+ cells/kg. HbF: fetal hemoglobin, HbS: sickle hemoglobin. □ participants on chronic transfusion and hydroxyurea (HU), ○ participants on chronic transfusions

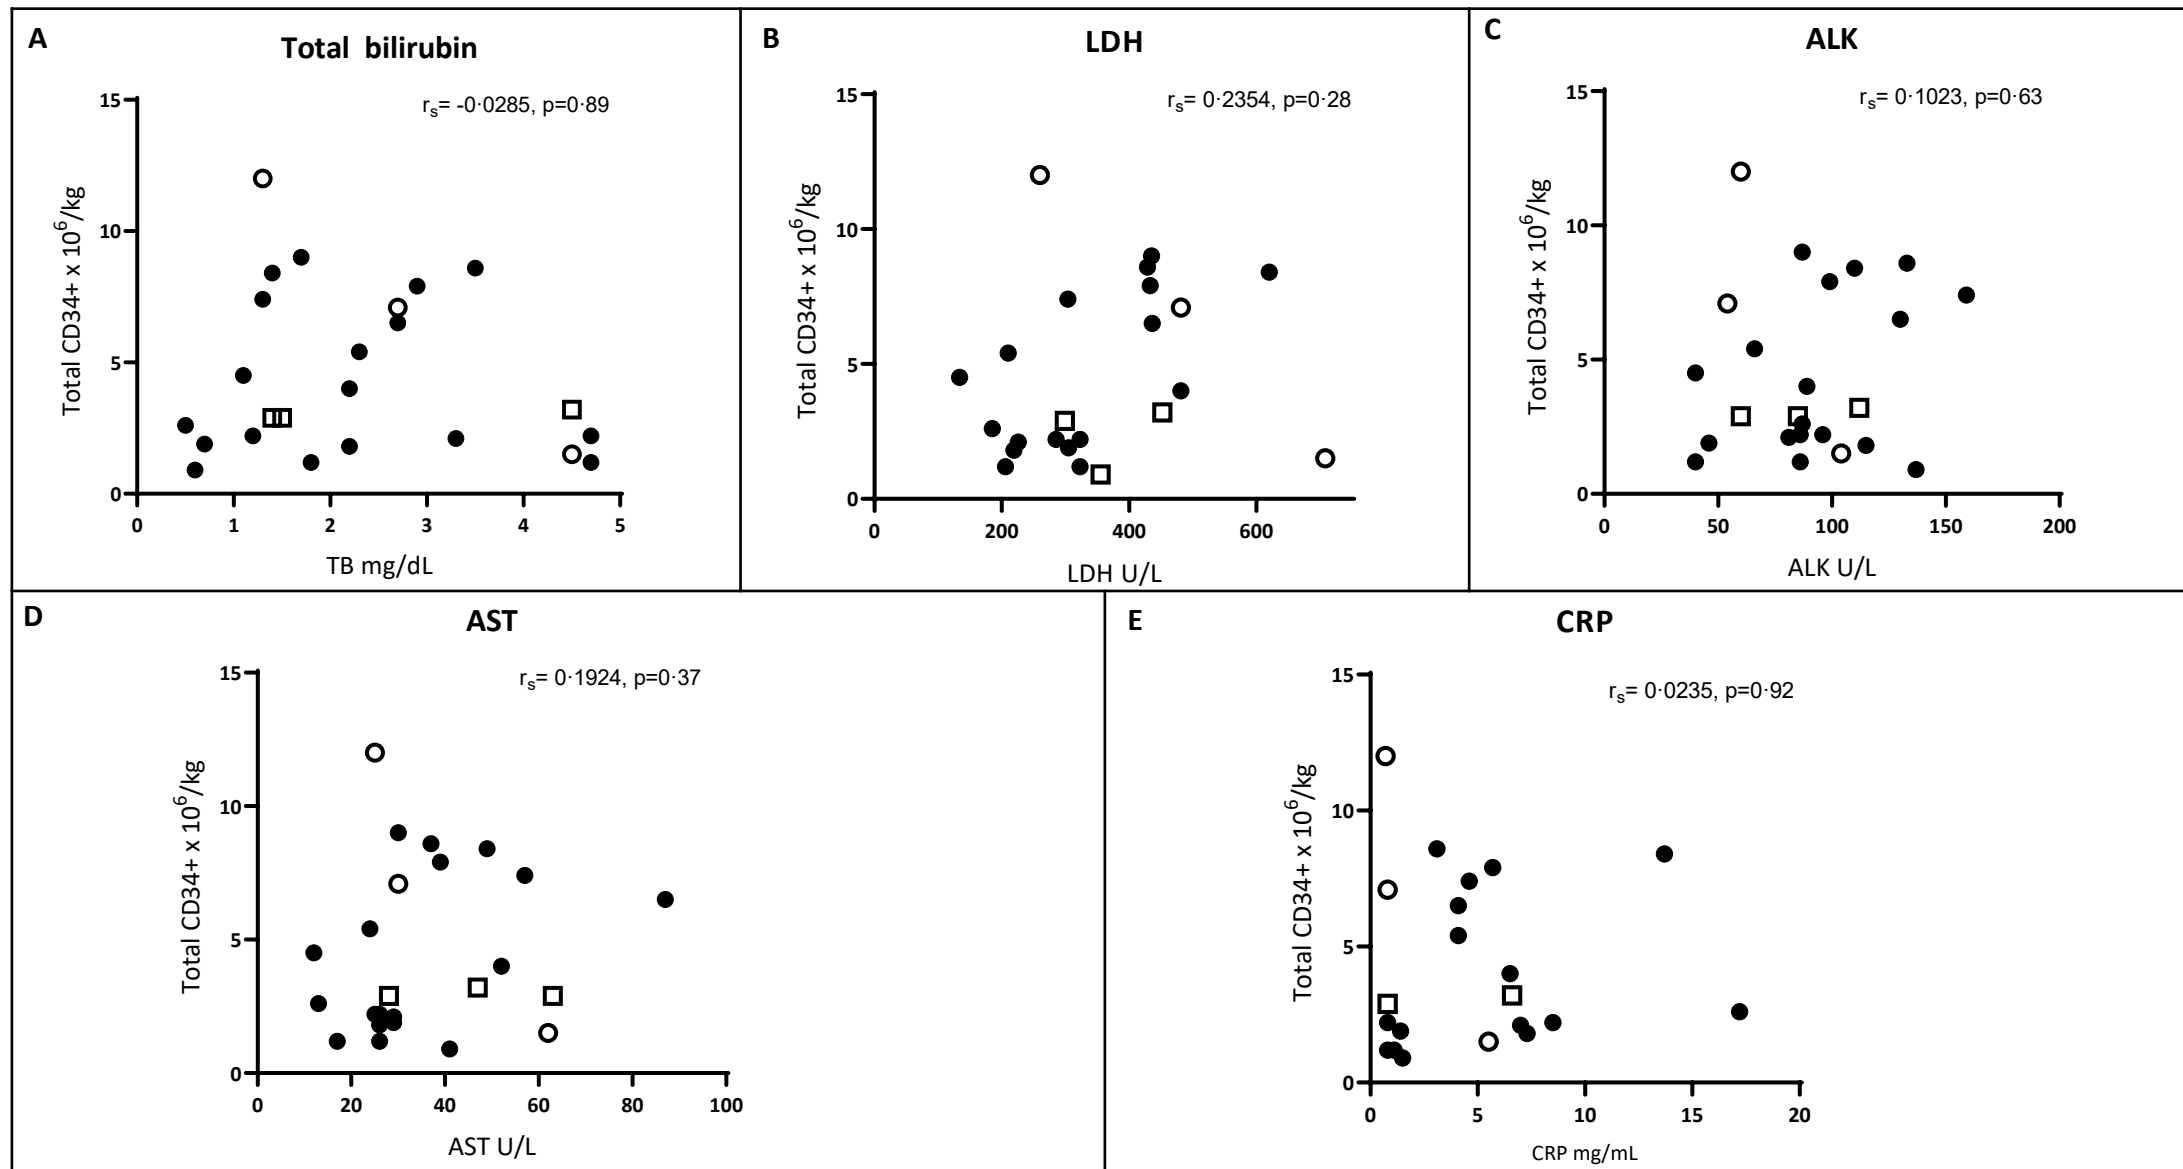

**Supplemental Figure 2. Correlation of total CD34+ collection with biochemical surrogate markers of hemolysis and inflammation**

A-D. Association of biochemical surrogate markers of hemolysis (total bilirubin, LDH, AST, and ALK) to total CD34+ cells/kg; E. Association of CRP used as a marker of inflammation with total CD34+ cells/kg. ALK: alkaline phosphatase, AST: aspartate aminotransferase, LDH: lactate dehydrogenase, CRP: C-reactive protein. □ participants on chronic transfusion and hydroxyurea (HU), ○ participants on chronic transfusions
